# Supplementary material for: Olfactory ensheathing cells promote nerve regeneration and functional recovery after facial nerve defects
Source: PubMed Central journal article supplement — Neural Regen Res. 2019 Jan;14(1):124–31. doi: 10.4103/1673-5374.243717 (PMC6263002; doi:10.4103/1673-5374.243717), 2019-01
Supplement: NRR-14-124_Suppl1.pdf [file NRR-14-124_Suppl1.pdf]

### **Open peer review report 1**

**Reviewer:** Shan-hui Hsu, National Taiwan University, China.

#### **Comments to the authors:**

General comments:

This work is very practical and some interesting and significant results have been presented. The major weakness is the limited novelty of the approach because of many previous literature.

Specific comments are given below:

Introduction: PLGA should be explained.

Methods: please check the unit 1000 r/min.

GFAP full name should appear first.

What is "GRAP"?

Neuro tube should be replaced by "nerve conduit" (Neuro tube is a commercial product)

Results: FG is not explained.

Discussion: Please remove the subtitles. Also, please compare the recovery rate (myelin number) with that in the existing literature.

Figures: Please check the labels in the figures 1a-1d scale bar missing; 1e: missing \*; 2a: Y axis missing; 3a-b, 4a-b, 5a-b: scale bars all missing.
